# Supplementary material for: Chirality transfer of cysteine to the plasmonic resonance region through silver coating of gold nanobipyramids
Source: Royal Society of Chemistry journal article supplement (doi:10.1039/d0cc07576k), 2021-01-01
Supplement: d0cc07576k1.pdf [file d0cc07576k1.pdf]

Electronic Supplementary Information (ESI) for ChemComm.

This journal is © The Royal Society of Chemistry 2020

*Electronic Supplementary Information for*

**Chirality transfer of cysteine to the plasmonic resonance region  
through silver coating on gold nanobipyramids**

Ye Wang,<sup>a</sup> Wei He,<sup>b</sup> Chun Hong Li,<sup>b</sup> Chang Xia,<sup>a</sup> Yuan Yan,<sup>a</sup> Chun Mei Li,<sup>\*b</sup> and Cheng Zhi Huang<sup>\*a,b</sup>

<sup>a</sup> Key Laboratory of Luminescence Analysis and Molecular Sensing (Southwest University), Ministry of Education, College of Chemistry and Chemical Engineering, Southwest University, Chongqing 400715, P. R. China.

<sup>b</sup> Key Laboratory of Luminescent and Real-Time Analytical System (Southwest University), Chongqing Science and Technology Bureau, College of Pharmaceutical Sciences, Southwest University, Chongqing 400715, P. R. China.

E-mail: [licm1024@swu.edu.cn](mailto:licm1024@swu.edu.cn), [chengzhi@swu.edu.cn](mailto:chengzhi@swu.edu.cn); Fax: +86 2368367257; Tel: +86 2368254659

## Experimental section

### 1. Materials and instruments.

Gold chloride trihydrate ( $\text{HAuCl}_4 \cdot 3\text{H}_2\text{O}$ , >99%) was purchased from Sinopharm Chemical Reagent Co, Ltd (Shanghai, China). Cetyltrimethylammonium bromide (CTAB, >99%), cetyltrimethylammonium chloride (CTAC, 97%), sodium borohydride ( $\text{NaBH}_4$ , 99%), silver nitrate ( $\text{AgNO}_3$ , 99.8%), ascorbic acid (L-AA, >99%) were obtained from Aladdin. L-cysteine (L-Cys) and D-cysteine (D-Cys) were purchased from Sigma-Aldrich. All reagents were used as received. All solutions were prepared using ultrapure water (18.2 M $\Omega$ ).

Absorption spectra were measured with an UV-3600 spectrophotometer (Shimadzu, Japan). SEM images were collected with a S-4800 field-emission SEM instrument (Hitachi, Japan) at 15 kV. CD spectra were recorded by a Jasco J-810 (Tokyo, Japan) spectropolarimeter in aqueous solution. A 400  $\mu\text{L}$  portion of each sample was infused into a 1 cm quartz cell and measured at the scan speed of 500 nm/min with a bandwidth of 10 nm. HAADF-STEM and elemental mapping were performed on an FEI Tecnai G2 F30 instrument (FEI, America). Ultrapure water obtained from a Millipore water purification system (18.2 M $\Omega \cdot \text{cm}$  resistivity) was used in all experiments.

### 2. Synthesis of gold bipyramids (Au NBP).

Synthesis of Au NBP refers to previous literature reports<sup>1</sup> by seed-mediated two-step growth method. Firstly, initial gold seeds were prepared in a scintillation vial (50 mL) by fast reduction of  $\text{HAuCl}_4$  (0.10 mL, 24 mM) with freshly prepared  $\text{NaBH}_4$  (0.25 mL, 25 mM) in an aqueous CTAC solution (50 mM, 9.8 mL), in the presence of citric acid (1 M, 0.050 mL) under vigorous stirring at room temperature. The mixture turned from light yellow to brownish, indicating the formation of gold seeds. After 2 minutes, the vial was closed and the seed solution was heated in an oil bath at 80 °C for 90 minutes under gentle stirring, leading to a gradual color change from brown to red. Next, the thermally treated seed solution was removed from the bath and stored at room temperature. The final Au concentration in the seed solution was 0.25 mM. Then, a certain volume of gold seeds (adjusting the volume according to need) was added under vigorous stirring to an aqueous growth solution containing CTAB (100 mM, 100 mL),  $\text{HAuCl}_4$  (10 mM, 5 mL),  $\text{AgNO}_3$  (10 mM, 1 mL), HCl (1M, 2 mL) and AA (100 mM, 0.8 mL). The mixture was kept at 30 °C for 3 h. After resuspension with 10 mM CTAB in order to make Au NBP long-term stable, put it in a 4 °C refrigerator and save it for further use (due to the extremely high yield, no further purification is required).

### 3. Synthesis of Au NBP @Cys @Ag nanoparticles.

For the preparation of Au NBP @Cys @Ag NPs, First, Au NBP was centrifuged twice (12000 rpm, 15 min) and redispersed in ultrapure water to the Au atom concentration of about 0.05 mM. Then, 118  $\mu\text{L}$  CTAC (10 mM), 5  $\mu\text{L}$   $\text{HNO}_3$  (0.01 M) and L- or D-Cys solution (10  $\mu\text{L}$ , 1 mM) was added to 312  $\mu\text{L}$  of Au NBP dilution, followed by incubation at 30  $^\circ\text{C}$  for 60 min. Sequentially,  $\text{AgNO}_3$  (10 mM, 45  $\mu\text{L}$ ), AA (100 mM, 22.5  $\mu\text{L}$ ) were added in above mixture solution. The Ag overgrowth was initiated by putting reaction solution in a 30  $^\circ\text{C}$  water bath and stopped after 1 h by taking reaction tube from water bath.

### 4. Cys acceleration effect on Au NBP@Ag.

To demonstrate the acceleration effect of Cys on Au NBP@Ag, 10  $\mu\text{L}$  different concentration of L- or D-Cys were added to 435  $\mu\text{L}$  Au NBP dilution (with 118  $\mu\text{L}$  CTAC, 5  $\mu\text{L}$   $\text{HNO}_3$ ) suspension and were incubated at 30  $^\circ\text{C}$  for 1h. Then, growth solution, containing  $\text{AgNO}_3$  (10 mM, 45  $\mu\text{L}$ ) and AA (0.1 M, 22.5  $\mu\text{L}$ ) was added.

### 5. Preparation of Au NBP @Ag NPs.

For the preparation of the Au NBP @Ag NPs, the same preparation method as that for above NPs was used except that no Cys solution was added and the reaction duration should be extended to 2 h at least.

### 6. Monitoring dynamic growth of Au NBP @Ag in the presence of Cys.

To study the dynamic growth, UV and CD spectrometer were used for monitoring the over progress. The amount of growth reagents containing  $\text{AgNO}_3$  (10 mM, 45  $\mu\text{L}$ ) and AA (0.1 M, 22.5  $\mu\text{L}$ ) were added into 435  $\mu\text{L}$  Au NBP (with 118  $\mu\text{L}$  CTAC, 5  $\mu\text{L}$   $\text{HNO}_3$ ) suspension pre-incubated with different concentration L-Cys for 1 h.

### 7. Au NBP @ Ag with different Ag layer thickness ( $\text{Ag}_1$ to $\text{Ag}_8$ ).

First, 118  $\mu\text{L}$  CTAC (10 mM), 5  $\mu\text{L}$   $\text{HNO}_3$  (0.01 M) and L- or D-Cys solution (10  $\mu\text{L}$ , 1 mM) was added to Au NBP solution (312  $\mu\text{L}$  dilution). Subsequently, the solution was incubated at 30  $^\circ\text{C}$  for 60 min. Then, keep the concentration ratio of  $\text{AgNO}_3$  and AA identical ( $c_{\text{AA}}/c_{\text{AgNO}_3}=5$ , making  $\text{Ag}^+$  react as completely as possible), for  $\text{Ag}_1$  and  $\text{Ag}_2$ , we added  $\text{AgNO}_3$  (1 mM) from 15.6  $\mu\text{L}$  to 31.2  $\mu\text{L}$ , subsequently the volume of AA solution

(0.01 M) was a half of  $\text{AgNO}_3$  for each sample. From  $\text{Ag}_3$  to  $\text{Ag}_8$ , the amount of  $\text{Ag}^+$  (10 mM) added was corresponding to 6.24  $\mu\text{L}$ , 7.80  $\mu\text{L}$ , 15.60  $\mu\text{L}$ , 23.40  $\mu\text{L}$ , 31.20 $\mu\text{L}$ , 39  $\mu\text{L}$ , and the volume of the AA solution (0.1 M) was a half of  $\text{AgNO}_3$  for each sample, too.

#### **8. Au NBP @ L-Cys-centri. + D-Cys @Ag NPs and Au NBP @ D-Cys-centri. + L-Cys @Ag NPs.**

For the preparation of Au NBP @ L-Cys-centri. + D-Cys @Ag NPs: First, 10  $\mu\text{L}$  of L-Cys (1 mM) were added into 435  $\mu\text{L}$  Au NBP (with 118  $\mu\text{L}$  CTAC, 5  $\mu\text{L}$   $\text{HNO}_3$ ) suspension and incubated at 30 °C for 1 h. After that, the mixtures were centrifuged (8000 rpm, 5 min). Then the precipitates were re-dispersed in same volume water and then 10  $\mu\text{L}$  D-Cys (1 mM) was added, they were mixed with the growth reagents immediately to initiate Ag deposition by putting in 30 °C water bath for 1h. The experimental operation steps of Au NBP@ D-Cys-centri. + L-Cys @Ag NPs was similar, except that L-Cys was replaced by D-Cys, and D-Cys was substituted to L-Cys.

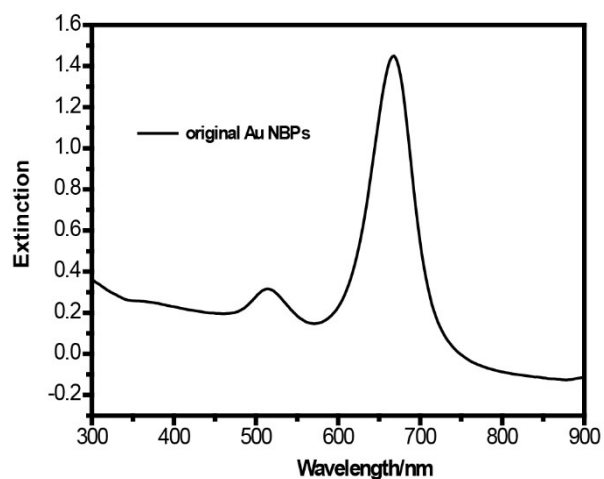

**Fig. S1** Extinction spectra of original Au NBPs.

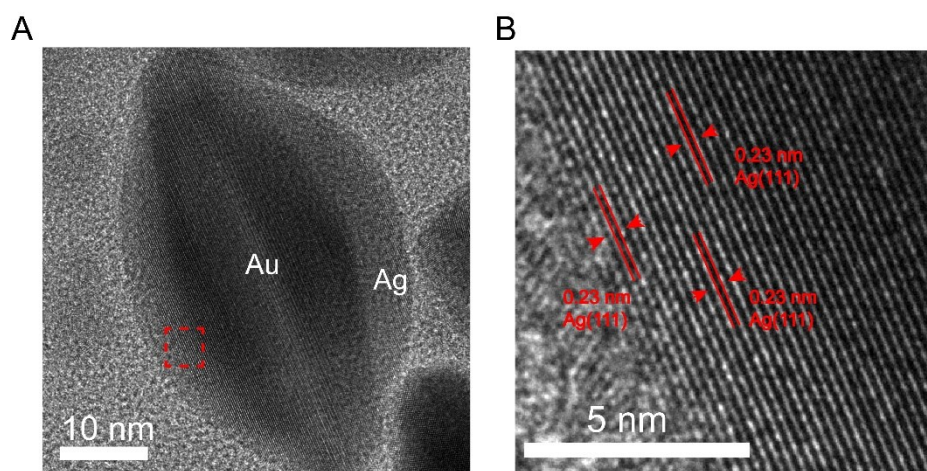

**Fig. S2.** (A) High-resolution TEM image of Au NBP@Cys@Ag nanostructure, scale bar = 10 nm, the red dashed frame area was the Ag shell; (B) high-resolution TEM image of the Ag shell, scale bar = 5 nm, 0.23 nm corresponds to the separation of {111} facets of Ag.

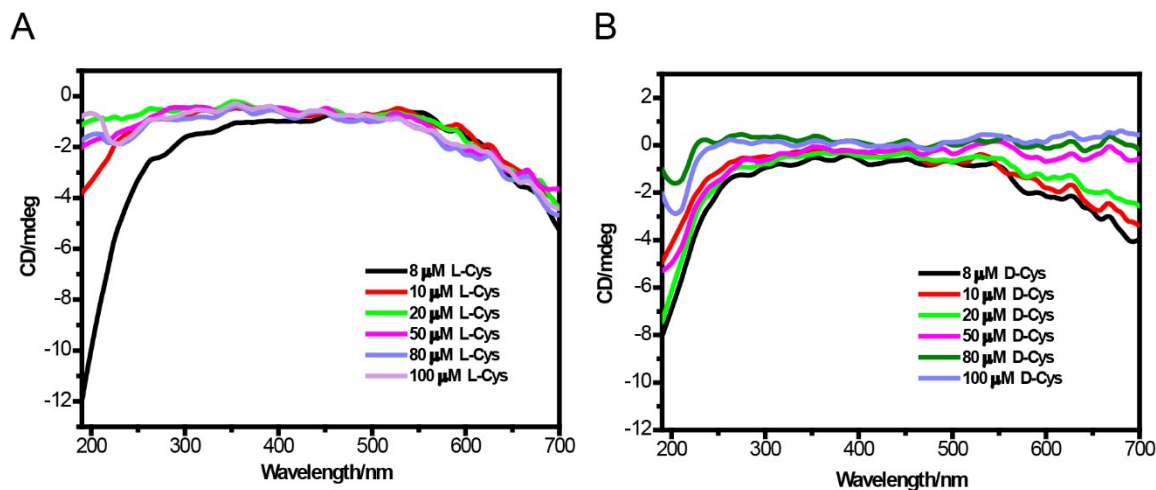

**Fig. S3** CD spectra of L-Cys (A) and D-Cys (B) with different concentrations. The datas were smoothed by setting the points of window parameter to 5.

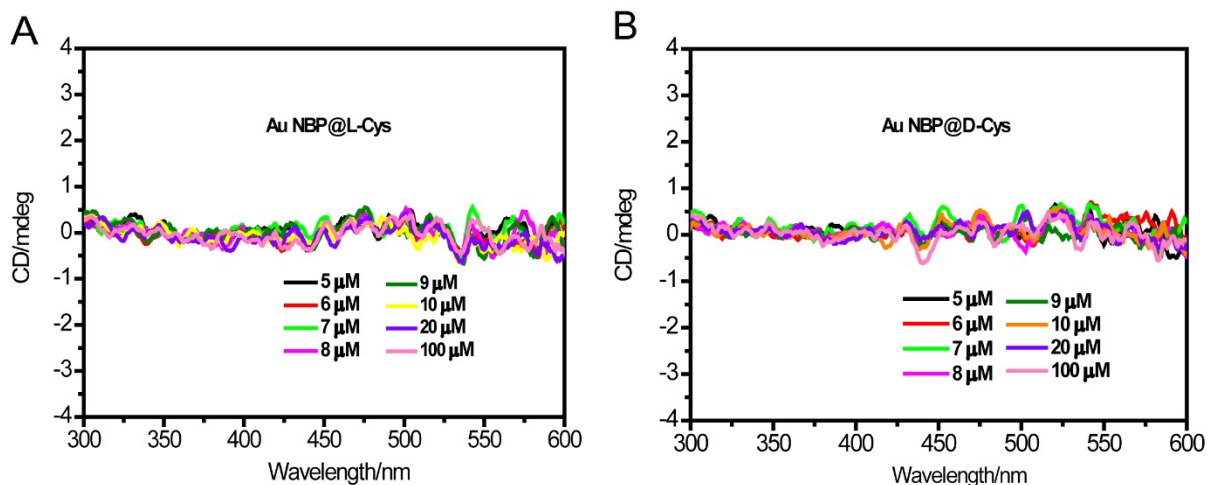

**Fig. S4** CD spectra of Au NBP@L-Cys (A) and Au NBP@D-Cys (B) with different concentration of Cys, respectively.

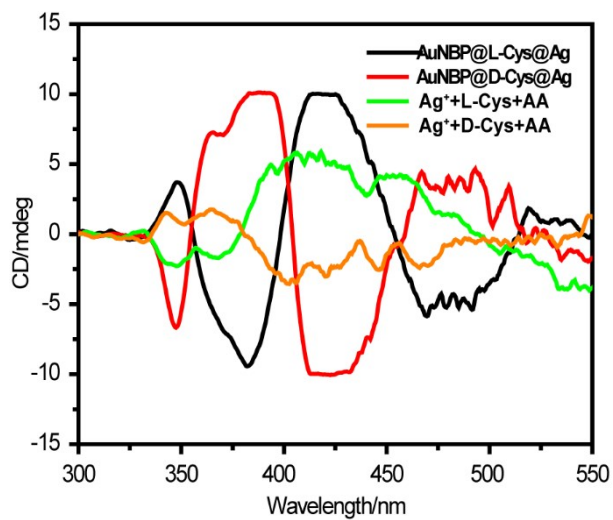

**Fig. S5** CD spectra of Au NBP@Cys@Ag and silver nanoparticles grown directly in the presence of cysteine.

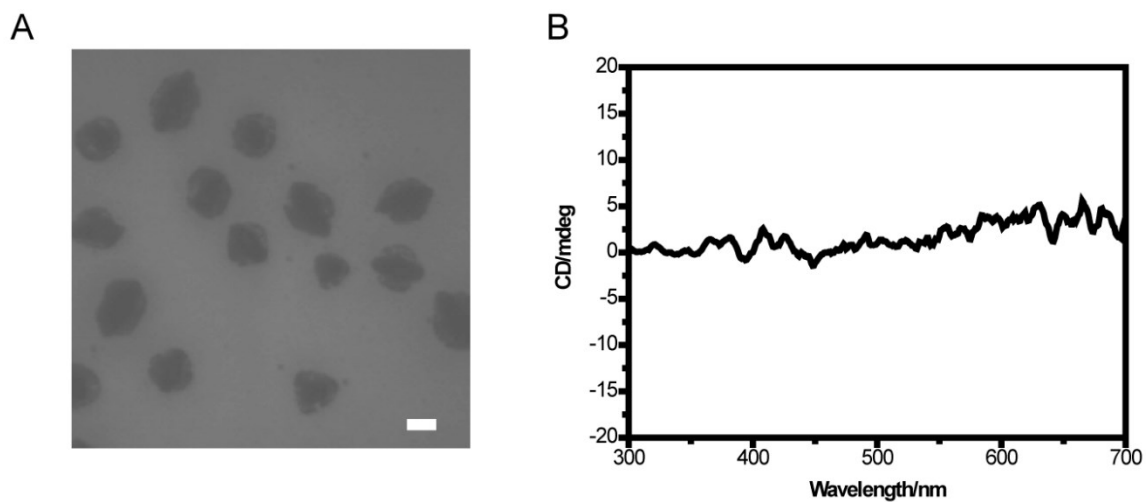

**Fig. S6** TEM (A) and CD spectra (B) of Au NBP@ L-Cys @Ag by reducing free Cys within Ag nanoshell, scale bar 20 nm.

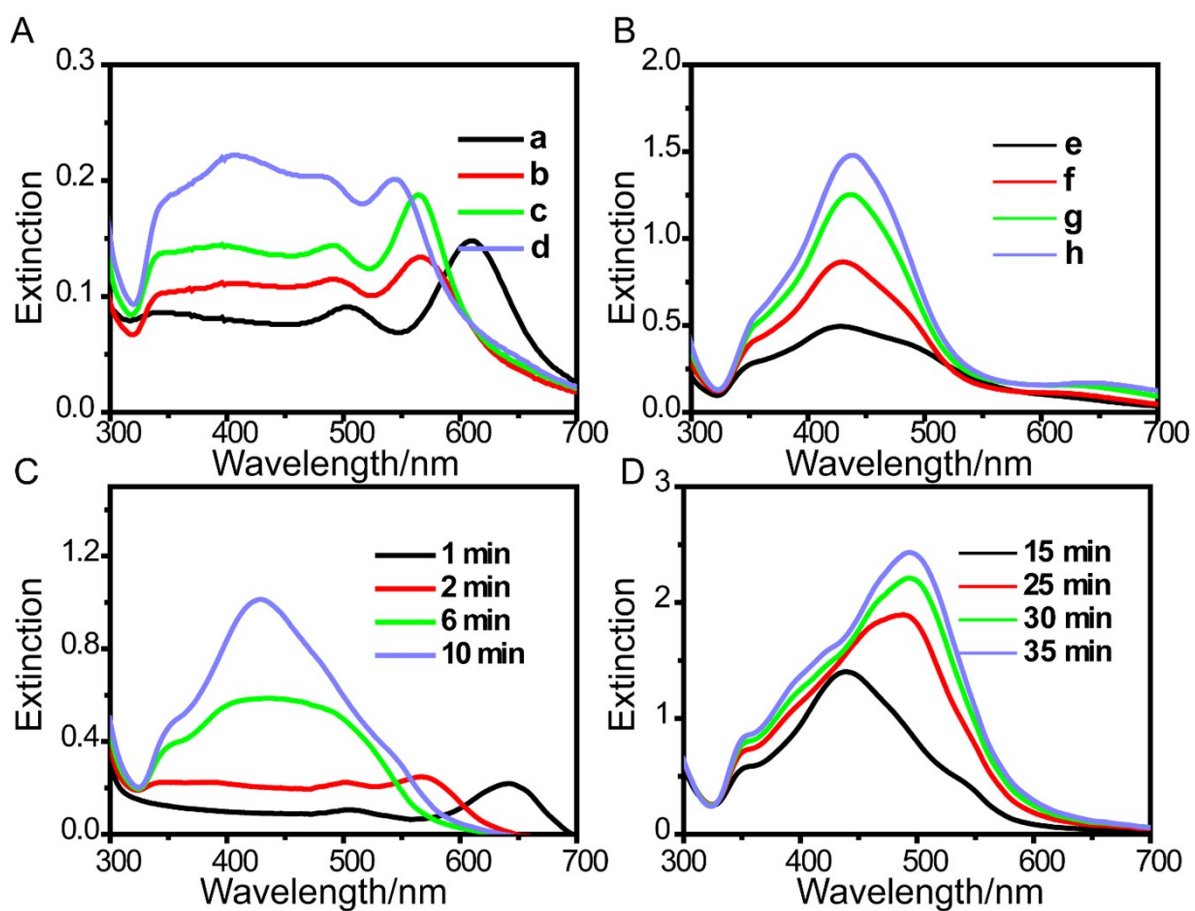

**Fig. S7** (A) Extinction spectra from a to d (Ag<sub>1</sub> to Ag<sub>4</sub>); (B) Extinction spectra from e to h (Ag<sub>5</sub> to Ag<sub>8</sub>); (C) and (D) Extinction spectra of dynamic growth of Au NBP@L-Cys@Ag from 1 to 35 min,  $c_{L-Cys} = 10 \mu\text{M}$ ,  $c_{Ag^+} = 0.79 \text{ mM}$ .



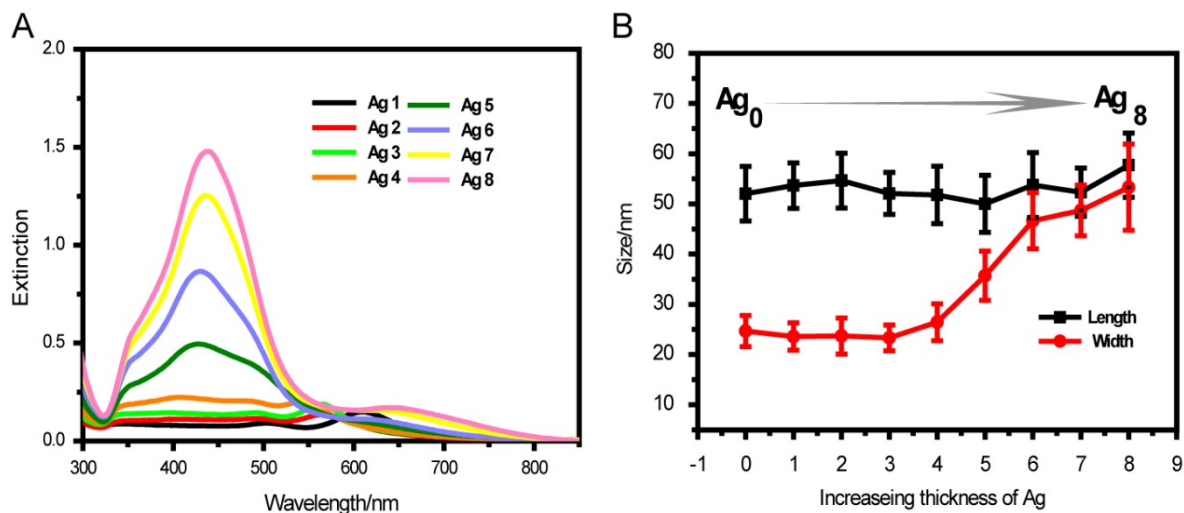

**Fig. S8** (A) Extinction and (B) plot of the length and width (equatorial zone) of Au NBP@Cys@Ag with increasing  $\text{Ag}^+$  added. ( $\text{Ag}_0$  means original Au NBP; From  $\text{Ag}_1$  to  $\text{Ag}_2$ , the amount of  $\text{Ag}^+$  (1 mM) added was 15.6  $\mu\text{L}$  to 31.2  $\mu\text{L}$ ; From  $\text{Ag}_3$  to  $\text{Ag}_8$ , the amount of  $\text{Ag}^+$  (10 mM) added was corresponding to 6.24  $\mu\text{L}$ , 7.80  $\mu\text{L}$ , 15.60  $\mu\text{L}$ , 23.40  $\mu\text{L}$ , 31.20  $\mu\text{L}$ , 39  $\mu\text{L}$ ).

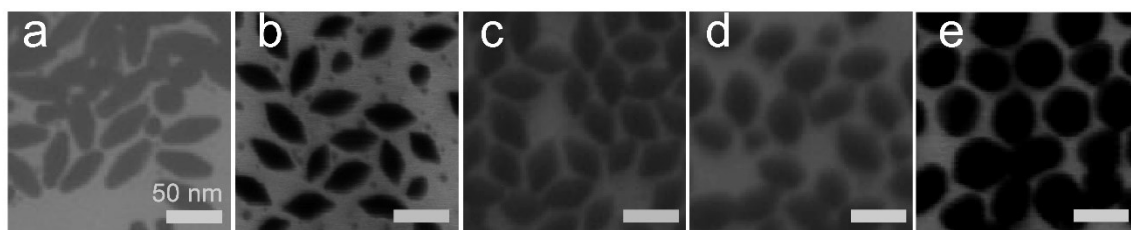

**Fig. S9** TEM images of different Ag shell thickness on Au NBP @Cys, scale bar =50 nm. (a-e, the amount of  $\text{Ag}^+$  (10 mM) added was corresponding to 7.80  $\mu\text{L}$ , 14.04  $\mu\text{L}$ , 15.60  $\mu\text{L}$ , 31.20  $\mu\text{L}$ , 43.68  $\mu\text{L}$ )

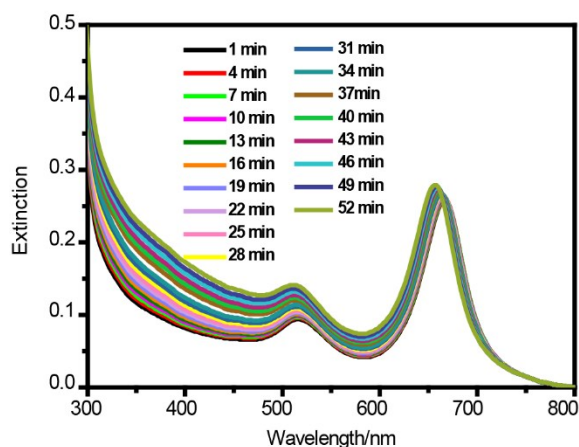

**Fig. S10** Extinction spectra of Au NBP @Ag in the absence of Cys (3 min interval).

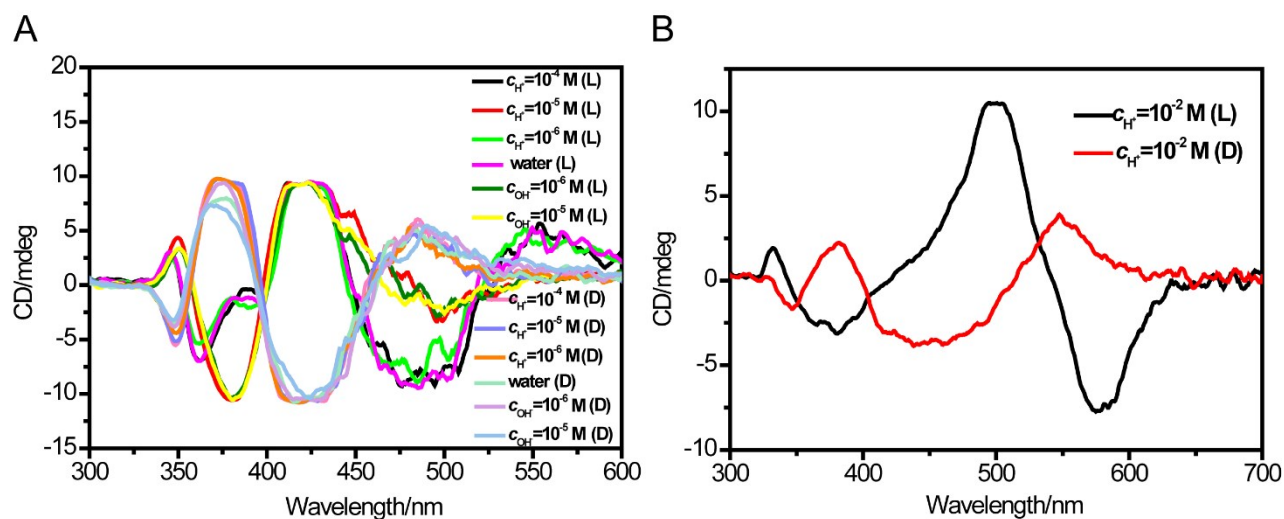

**Fig. S11** CD spectra of Au NBP@Cys@Ag at different pH value of the solution. (A) at different acidic and alkaline solutions; (B) with the acid concentration was  $10^{-2}$  M, L inside brackets for Au NBP@L-Cys@Ag, and D inside brackets for Au NBP@D-Cys@Ag.

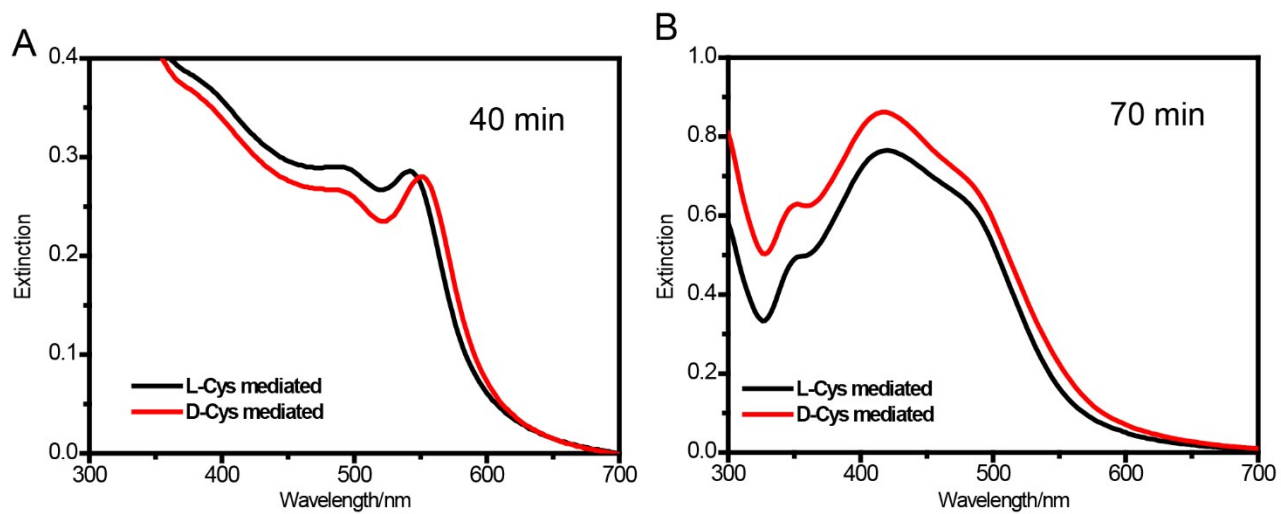

**Fig. S12** Extinction spectra of Au NBP@Cys@Ag NPs by adjusting acid concentration to 0.01 M, reacted for 40 min (A) and 70 min (B), red line represented Au NBP@D-Cys@Ag, and the black line represented Au NBP@L-Cys@Ag,  $c_{\text{Cys}} = 10 \mu\text{M}$ .  $c_{\text{Ag}^+} = 0.9 \text{ mM}$ .

**Table S1. Calculated g-factors for obtained Au NBP @ L/D-Cys @Ag core-shell nanocrystals by adjusting acid concentration to 0.01 M after reacting for 40 min.**

| CD peak                | 564 nm | 498 nm | 384 nm |
|------------------------|--------|--------|--------|
| $g_L (\times 10^{-3})$ | -1.008 | 1.222  | -0.323 |
| $g_D (\times 10^{-3})$ | 1.258  | -1.306 | 0.371  |

$c_{\text{Cys}} = 10 \mu\text{M}$ ,  $c_{\text{Ag}^+} = 0.9 \text{ mM}$ .

**Table S2. Calculated g-factors for obtained Au NBP @ L/D-Cys @Ag core-shell nanocrystals by adjusting acid concentration to 0.01 M after reacting for 70 min.**

| CD peak                | 508 nm | 416 nm | 352 nm |
|------------------------|--------|--------|--------|
| $g_L (\times 10^{-3})$ | -0.457 | 0.451  | -0.331 |
| $g_D (\times 10^{-3})$ | 0.373  | -0.300 | 0.238  |

$c_{\text{Cys}} = 10 \mu\text{M}$ ,  $c_{\text{Ag}^+} = 0.9 \text{ mM}$ .

**Table S3 to Table S7. Calculated g-factors for obtained Au NBP @ L/D-Cys @ Ag with increasing  $\text{Ag}^+$  added.**

**Table S3. Calculated g-factors for obtained Au NBP @ L/D-Cys @ Ag shell nanocrystals.**

| CD peak                | 348 nm | 378 nm | 413 nm |
|------------------------|--------|--------|--------|
| $g_L (\times 10^{-3})$ | 0.069  | 0.167  | -0.060 |
| $g_D (\times 10^{-3})$ | -0.065 | -0.028 | 0.120  |

$c_{\text{Cys}} = 10 \mu\text{M}$ ,  $c_{\text{Ag}^+} = 0.156 \text{ mM}$ .

**Table S4. Calculated g-factors for obtained Au NBP @ L/D-Cys @ Ag shell nanocrystals.**

| CD peak                | 376 nm | 416 nm |
|------------------------|--------|--------|
| $g_L (\times 10^{-3})$ | 0.235  | -0.070 |
| $g_D (\times 10^{-3})$ | -0.086 | 0.126  |

$c_{\text{Cys}} = 10 \mu\text{M}$ ,  $c_{\text{Ag}^+} = 0.187 \text{ mM}$ .

**Table S5. Calculated g-factors for obtained Au NBP @ L/D-Cys @ Ag shell nanocrystals.**

| CD peak                | 355 nm | 377 nm | 421 nm |
|------------------------|--------|--------|--------|
| $g_L (\times 10^{-3})$ | -0.052 | 0.245  | -0.075 |
| $g_D (\times 10^{-3})$ | 0.072  | -0.123 | 0.132  |

$c_{\text{Cys}} = 10 \mu\text{M}$ ,  $c_{\text{Ag}^+} = 0.218 \text{ mM}$ .

**Table S6. Calculated g-factors for obtained Au NBP @ L/D-Cys @ Ag shell nanocrystals.**

| CD peak                | 357 nm | 378 nm | 421 nm |
|------------------------|--------|--------|--------|
| $g_L (\times 10^{-3})$ | -0.089 | 0.201  | -0.063 |
| $g_D (\times 10^{-3})$ | 0.126  | -0.190 | 0.119  |

$c_{\text{Cys}} = 10 \mu\text{M}$ ,  $c_{\text{Ag}^+} = 0.312 \text{ mM}$ .

**Table S7. Calculated g-factors for obtained Au NBP @ L/D-Cys @ Ag shell nanocrystals.**

| CD peak                | 390 nm | 418 nm |
|------------------------|--------|--------|
| $g_L (\times 10^{-3})$ | -0.164 | 0.260  |
| $g_D (\times 10^{-3})$ | 0.289  | -0.249 |

$c_{\text{Cys}} = 10 \mu\text{M}$ ,  $c_{\text{Ag}^+} = 0.780 \text{ mM}$ .

Anisotropy factors (g-factors) represented the degree of asymmetry and the equation for calculating the g-factor in each data mode was given below<sup>2</sup>:

$$g = \Omega (\text{mdeg}) / (32980 \times A)$$

where  $\Omega$  (mdeg) and A were the CD signal intensity and the extinction of nanocrystal solution, respectively.

## References

1. A. Sanchez-Iglesias, N. Winckelmans, T. Altantzis, S. Bals, M. Grzelczak and L. Liz-Marzan, *J. Am. Chem. Soc.*, 2017, **139**, 107-110.
2. Y. Zhao, L. G. Xu, W. Ma, L. B. Wang, H. Kuang, C. L. Xu and N. A. Kotov, *Nano.Lett.*, 2014, **14**, 3908-3913.
